# Supplementary material
Source: ML conference proceedings conference paper supplement (https://proceedings.neurips.cc/paper_files/paper/2015/hash/286674e3082feb7e5afb92777e48821f-Abstract.html)
Supplement: Supplementary file [file 286674e3082feb7e5afb92777e48821f-Supplemental.zip]

## 5 Empirical Affinity SVRG

**Algorithm 4** Empirical Affinity SVRG algorithm. The parameters  $c_1 > 1 > c_2$  were tuned for the MNIST dataset to 1.2, 0.8, and reused elsewhere.

1.  $w^0 = \hat{w}^0 = 0 \in \mathbb{R}^d$ ,  $A_i^0 = 0 \forall i \in [n]$ .
2. For  $\tau \in \{1, \dots\}$ :
  - (a)  $\tilde{w}^\tau = \hat{w}^\tau$
  - (b) Compute  $\tilde{v}^\tau = \nabla F(\tilde{w}^\tau)$
  - (c) Define  $r^\tau = \frac{2}{\mu} \|\tilde{v}^\tau\|$  (by  $\mu$  strong convexity,  $w^* \in B(\tilde{w}^\tau, r)$ )
  - (d) For each  $i$ , compute  $\tilde{L}_{i,r}^\tau = \max_{w \in B(\tilde{w}^\tau, r)} \nabla^2 \phi_i(x_i^\top w)$
  - (e)  $p_i^\tau \propto (p_i^{\tau,1} + p_i^{\tau,2})/2$ , where  $p_i^{\tau,1} \propto \tilde{L}_{i,r}^\tau$  and  $p_i^{\tau,2} \propto A_i^{(\tau-1)m}$
  - (f)  $\hat{L}_i^\tau = \begin{cases} \tilde{L}_{i,r}^\tau & \tau = 1 \\ A_i^t & \text{otherwise} \end{cases}$
  - (g)  $\eta^\tau = 1 / (8 \max_i (\hat{L}_i^\tau / (np_i^\tau)))$
  - (h) For  $t \in [(\tau-1)m+1, \tau m]$ :
    - i. Choose  $i^t \sim p^\tau$
    - ii.  $\Delta_{i^t}^t = \nabla \phi_{i^t}(w^{t-1}) - \nabla \phi_{i^t}(\tilde{x})$
    - iii.  $A_j^t = \begin{cases} c_1 \tilde{L}_{j,r}^\tau & j = i^t; |\Delta_j^t| > 0 \\ c_2 A_j^{t-1} & j = i^t; \Delta_j^t = 0 \\ A_j^{t-1} & \text{otherwise} \end{cases} \quad \forall j \in [n]$
    - iv.  $v^t = \Delta_{i^t}^t / (np_{i^t}^\tau) + \tilde{v}$
    - v.  $w^t = w^{t-1} - \eta v^t$
  - (i)  $\hat{w}^\tau = m^{-1} \sum_{t \in [(\tau-1)m+1, \tau m]} w^t$

## 6 Proof of Theorem 10

*Proof.* In step 2a we identify  $B = B(\tilde{w}^\tau, r)$  such that  $w^* = w(\alpha^*) \in B$ . Then using Lemma 9, the set of points  $I_\tau$  defined in step 2b have  $\alpha_i^{(\tau-1)m}$  set to  $\alpha_i^*$  in step 2c, and that correct value is retained for all  $t \geq (\tau-1)m$  because  $p_i^\tau = 0$  henceforth. Also,  $\phi_i$  are affine on  $B$ . Now consider a problem that is equivalent on  $B$ , where  $\phi_i$  for  $i \in I^\tau$  are replaced by their affine approximations at  $\tilde{w}^\tau$ :

$$\bar{\phi}_i(w) = \begin{cases} \phi_i(\tilde{w}^\tau) + (w - \tilde{w}^\tau)^\top \nabla \phi_i(\tilde{w}^\tau) & i \in I^\tau \\ \phi_i & \text{otherwise} \end{cases};$$

the conjugates  $\bar{\phi}_i^*$  of the affine approximations admit (are finite on) only the correct value  $\alpha_i^*$ . Then the iterations of Algorithm 2 in substeps of 2e behave exactly like Iprox-SDCA of [9] (the full version of [10]) applied to the modified problem. Now note that since Iprox-SDCA assigns  $p_i \propto 1 + L_i(n\mu)^{-1}$ , and  $\bar{\phi}_i$  have  $L_i = 0$  on  $I^\tau$ , hence ignores them completely, progress of Iprox-SDCA on the modified problem is equal to that on a reduced modified problem from which  $I^\tau$  are removed entirely (having  $P'(w) = n^{-1} \sum_{i \in [n] \setminus I^\tau} \bar{\phi}_i(w) + R(w)$ ). By Lemma 2 of [9] and weak duality, we have

$$\mathbb{E} D'(\alpha^*) - D'(\alpha^t) \geq \mathbb{E} D'(\alpha^{t+1}) - D'(\alpha^t) \geq \frac{s}{n'} [P'(w(\alpha^t)) - D'(\alpha^t)] \geq \frac{s}{n'} [D'(\alpha^*) - D(\alpha^t)].$$

Then on one hand it is enough to achieve  $\varepsilon \geq \frac{n'}{s} [D'(\alpha^*) - D'(\alpha^t)] \geq P'(w(\alpha^t)) - D(\alpha^t)$ , and on the other  $D'(\alpha^*) - \mathbb{E} D'(\alpha^{t+1}) \leq (1 - \frac{s}{n'}) (D'(\alpha^*) - D'(\alpha^t))$  and hence  $D'(\alpha^*) - \mathbb{E} D'(\alpha^{t+k}) \leq (1 - \frac{s}{n'})^k (D'(\alpha^*) - D'(\alpha^t)) \leq \exp(-\frac{sk}{n'}) (D'(\alpha^*) - D'(\alpha^t))$ . Then it is

enough to have  $\frac{n'}{s} \exp\left(-\frac{sk}{n'}\right) \varepsilon^\tau \leq \varepsilon \iff k \geq \frac{n'}{s} \log\left(\frac{n' \varepsilon^\tau}{s \varepsilon}\right)$ . Applying Proposition 2 of [9] to the reduced and modified problem, we obtain

$$\frac{n'}{s} = n' + \mu^{-1} \left( n^{-1} \sum_{i \in [n] \setminus I^\tau} L_i \right).$$

□

## 7 Empirical results for SVRG

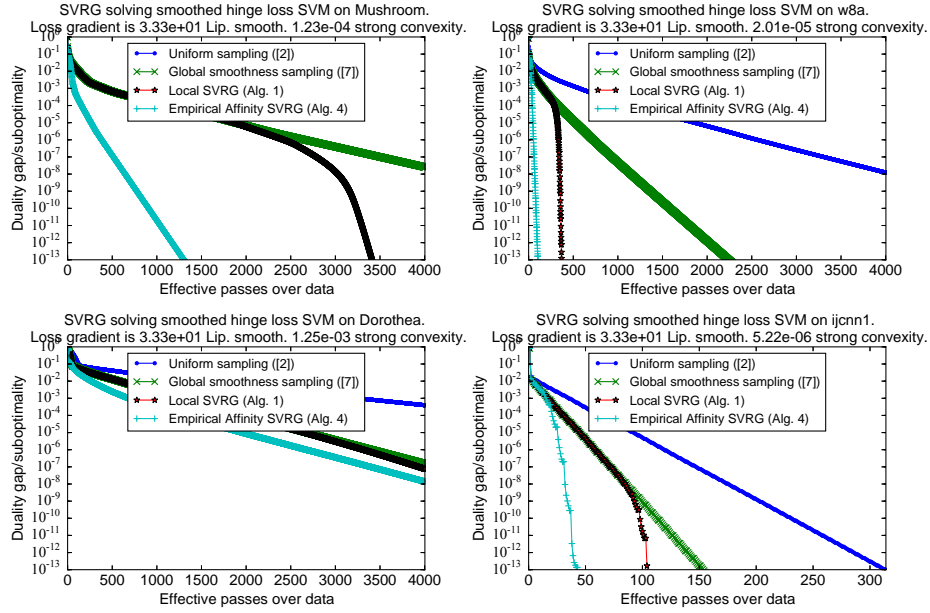

Figure 5: SVRG variant results on four additional datasets. For the Mushroom dataset, the global plot occludes the uniform.
